# Supplementary material for: Solution-Processable Benzo[b]thieno[2,3-d]thiophene Derivatives as Organic Semiconductors for Organic Thin-Film Transistors
Source: MDPI journal article supplement (doi:10.3390/coatings13081417), 2023-08-12
Supplement: s1 [file s1]

# Supplementary Materials: Solution-Processable Benzo[*b*]thieno [2,3-*d*]thiophene Derivatives as Organic Semiconductors for Organic Thin-Film Transistors

Seongyun Kim <sup>1,†</sup>, Soomin Ryu <sup>2,†</sup>, Jihae Ahn <sup>2</sup>, Dongkyu Kim <sup>3</sup>, Assunta Marrocchi <sup>4</sup>, Choongik Kim <sup>1,\*</sup>, and SungYong Seo <sup>2,5,\*</sup>

<sup>1</sup> Department of Chemical and Biomolecular Engineering, Sogang University, Seoul 04107, Republic of Korea; ksy99791551@gmail.com

<sup>2</sup> Department of Smart Green Technology Engineering, Pukyong National University, Busan 48513, Republic of Korea; soomin009@naver.com (S.R.); fks0409@naver.com (J.A.)

<sup>3</sup> Advanced Materials Division, Korea Research Institute of Chemical Technology (KRICT), Daejeon 34114, Republic of Korea; kdongkyu@kRICT.re.kr

<sup>4</sup> Department of Chemistry, Biology and Biotechnology, University of Perugia, Via Elce di Sotto, 8, 06123 Perugia, Italy; assunta.marrocchi@unipg.it

<sup>5</sup> Department of Chemistry, Pukyong National University, Busan 48513, Republic of Korea

\* Correspondence: choongik@sogang.ac.kr (C.K.); syseo@pknu.ac.kr (S.S.)

† These authors contributed equally to this work.

(a)

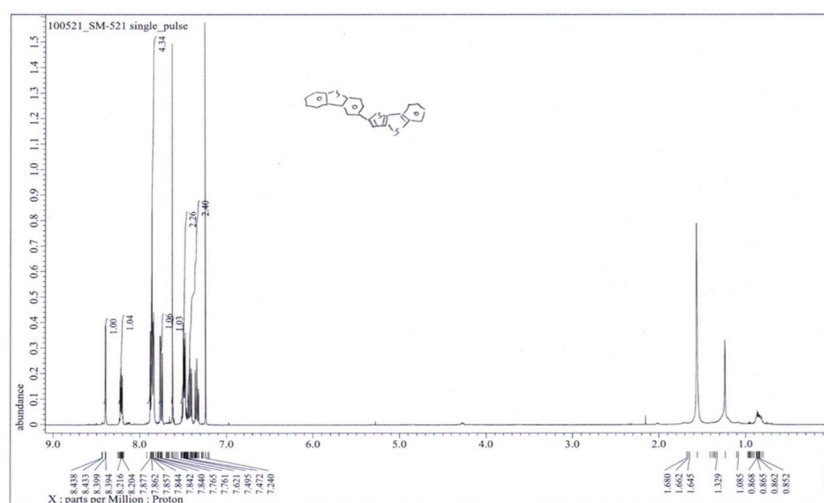

(b)

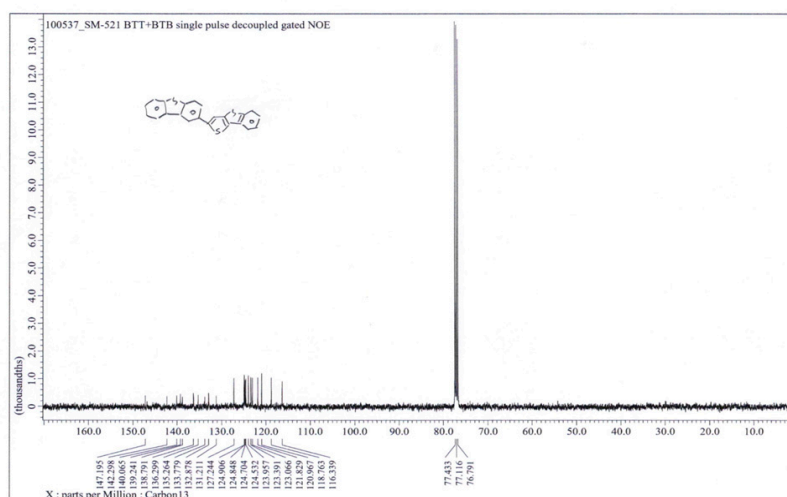

(c)

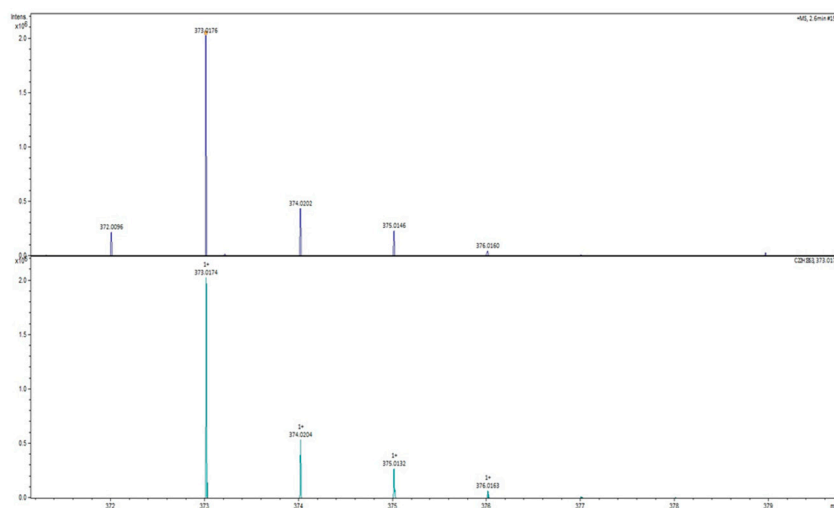

(d)

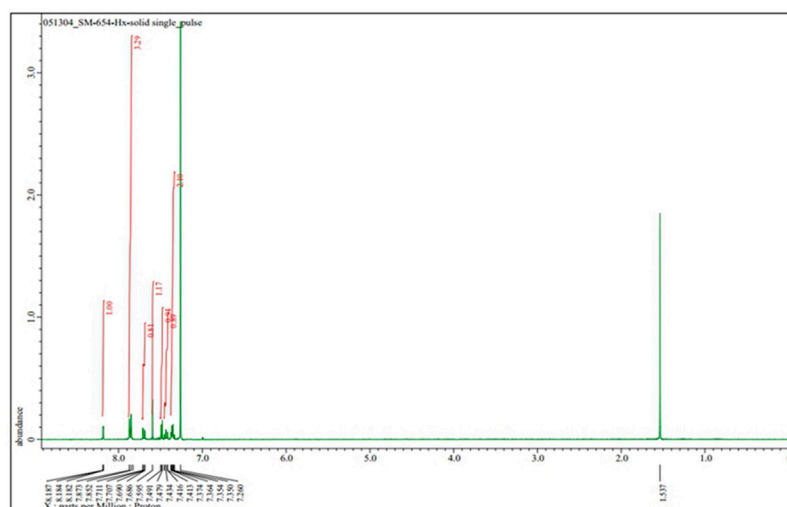

(e)

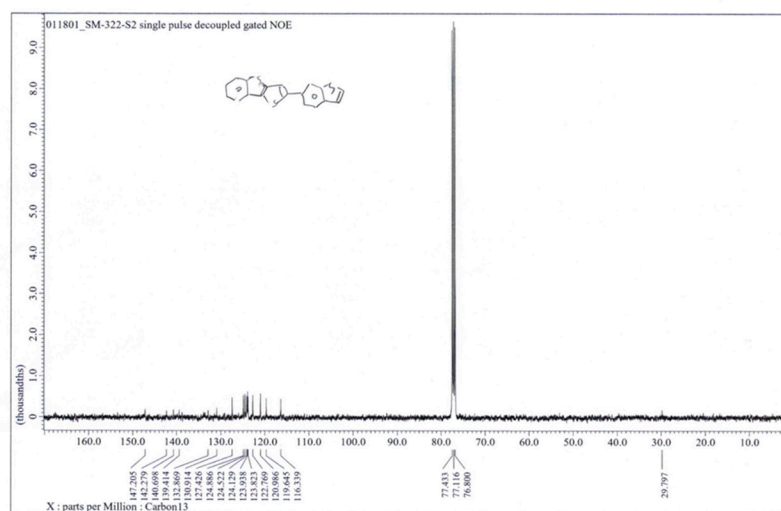

(f)

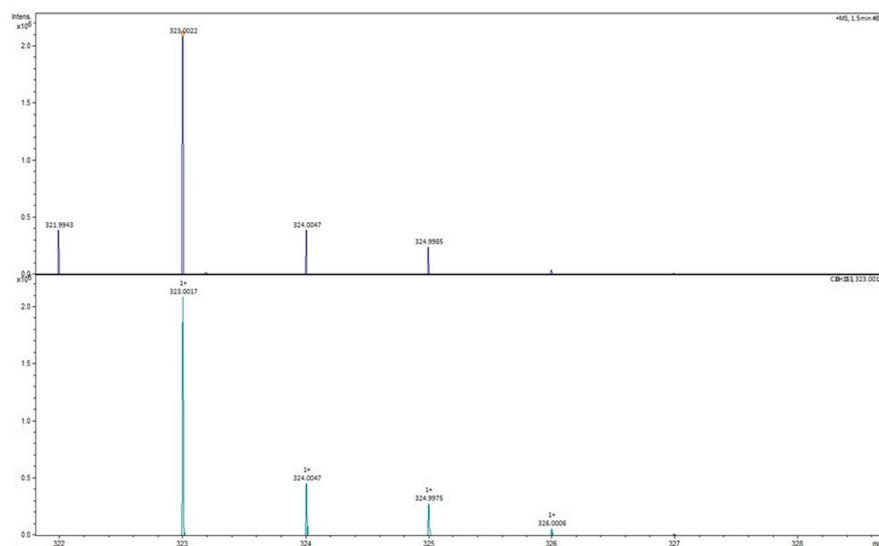

**Figure S1.** (a) H NMR, (b) C NMR, (c) Q-TOF MS spectra of compound 2, (d) H NMR, (e) C NMR, (c) Q-TOF MS spectra of compound 3.

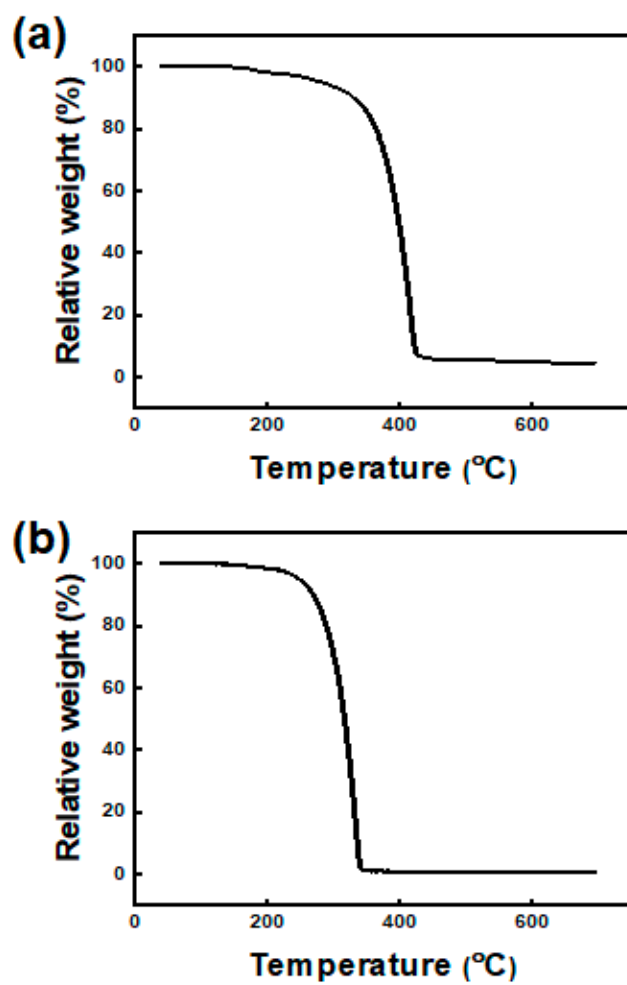

Figure S2. Thermogravimetric analysis of (a) compound 2 and (b) compound 3.

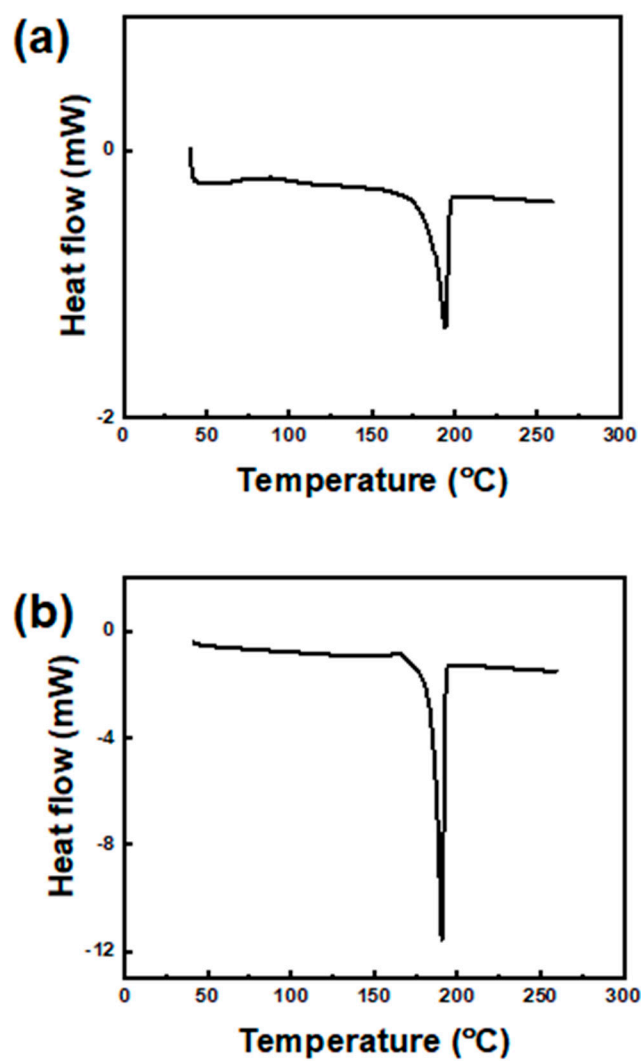

Figure S3. Differential scanning calorimetry of (a) compound 2 and (b) compound 3.

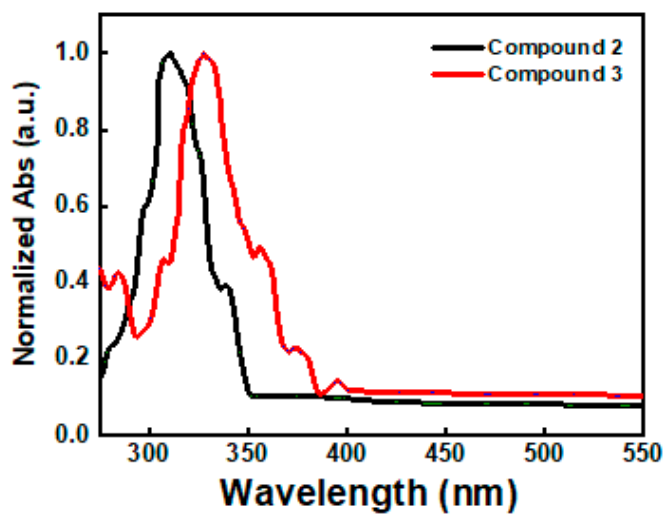

Figure S4. UV-vis absorption spectra of compounds 2 – 3 as thin films on glass substrate.

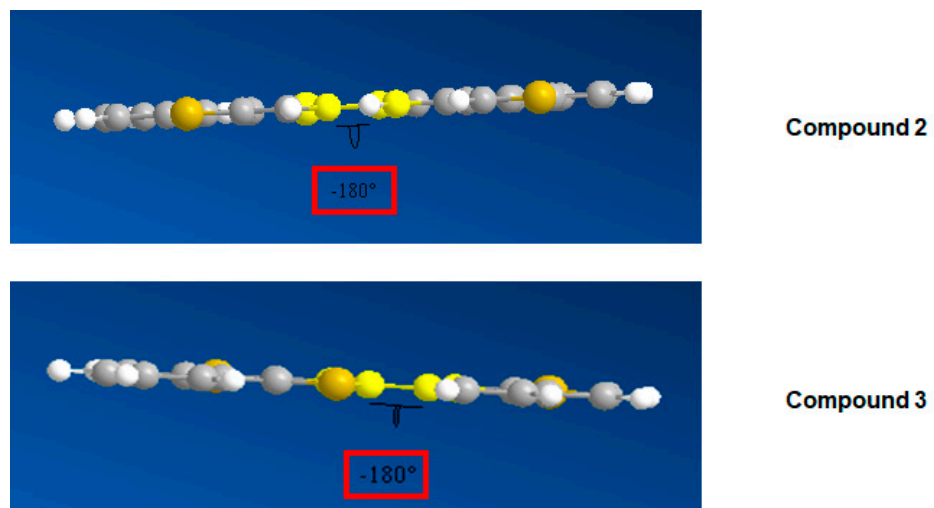

**Figure S5.** Optimized conjugated backbone planarity of compounds 2 – 3 obtained by DFT calculation (dihedral angle =  $-180^\circ$ ).

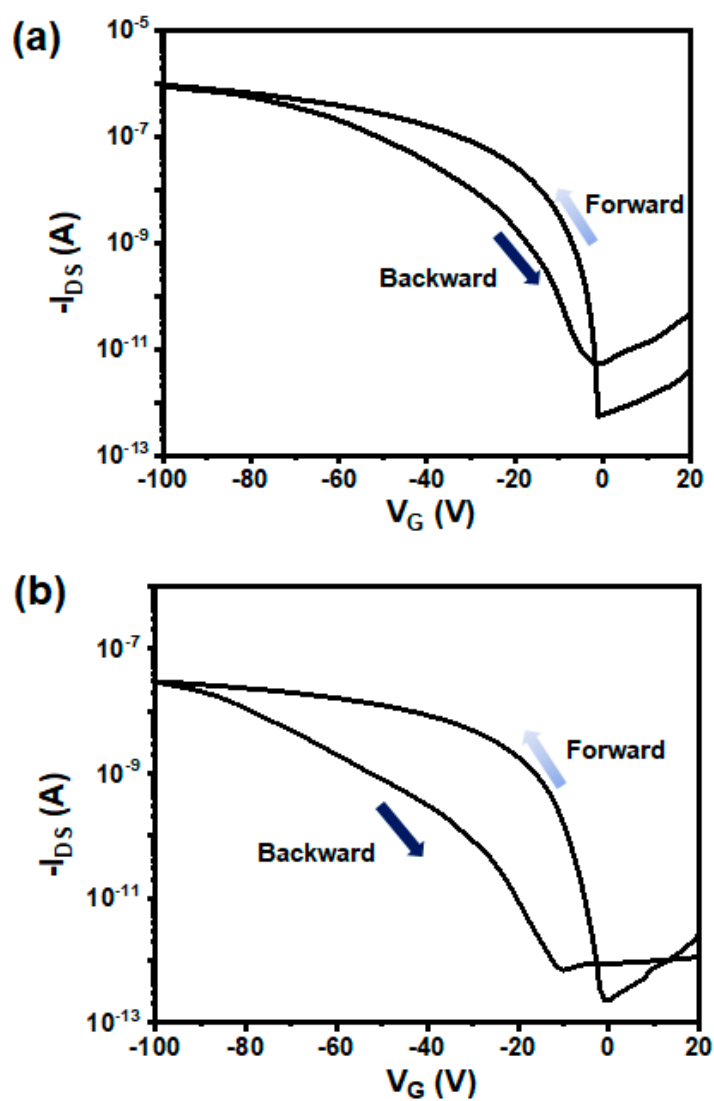

**Figure S6.** Transfer curve including the hysteresis of scanning of the OFETs based on (a) compound 3 (b) compound 2.
